# Supplementary material for: Astigmatism and maternal myopia as important factors affecting success rate of DIMS lens treatment
Source: HighWire-hosted journal article supplement (doi:10.1136/bmjophth-2023-001499), 2024-03-01
Supplement: bmjophth-2023-001499supp001_data_supplement.pdf [file bmjophth-2023-001499supp001_data_supplement.pdf]

## SUPPLEMENTAL MATERIAL

**Astigmatism and maternal myopia as important factors affecting success rate of DIMS lens treatment**

Patricia Domsa<sup>1,2\*</sup>, Éva M. Bankó<sup>3\*</sup>, Judit Körtvélyes<sup>1</sup>, Christof Meigen<sup>4</sup>, Rita Széche<sup>1,5</sup>, Krisztina Lantos<sup>2</sup>, Zoltán Zs. Nagy<sup>5†</sup>, Adrienne Csutak<sup>2†</sup>

<sup>1</sup>Non Plus Ultra Vision Centre, Budapest, Hungary, <sup>2</sup>Department of Ophthalmology, University of Pécs Medical School, Pécs, Hungary, <sup>3</sup>Brain Imaging Centre, HUN-REN Research Centre for Natural Sciences, Budapest, Hungary, <sup>4</sup>LIFE Child, LIFE Leipzig Research Center for Civilization Diseases, Leipzig University, Leipzig, Germany, <sup>5</sup>Department of Ophthalmology, Semmelweis University, Budapest, Hungary,

In addition to computing and analysing the spherical equivalent, we also transformed S/C<sub>A</sub> refractive data into Long's matrix formalism based on the equations below[1]:

$$P = \begin{bmatrix} f_{11} & f_{12} \\ f_{21} & f_{22} \end{bmatrix}$$

$$f_{11} = S + C \sin^2 A$$

$$f_{22} = S + C \cos^2 A$$

$$f_{12} = f_{21} = -C \sin A \cos A$$

where  $P$  is the total refractive power,  $S$  is spherical power,  $C$  is cylindrical power with axis  $A$ . After computing descriptive and ANCOVA statistics the components were back transformed to determine the spherocylindrical parameters following Keating's method [2]:

$$C = \pm \sqrt{t^2 - 4d}$$

$$S = \frac{t - C}{2}$$

$$A = \tan^{-1} \left( \frac{S - f_{11}}{f_{12}} \right)$$

where  $t$  is the trace, and  $d$  is the determinant of the matrix  $P$ :

$$t = f_{11} + f_{22}$$

$$d = f_{11}f_{22} - f_{12}f_{21}$$

1. Long WF. A matrix formalism for decentration problems. *Am J Optom Physiol Opt*. 1976;53:27–33.

<https://doi.org/10.1097/00006324-197601000-00005>

2. Keating MP. On the Use of Matrices for the Mean Value of Refractive Errors. *Ophthalmic Physiol Opt*.

1983;3:201–3. <https://doi.org/10.1111/j.1475-1313.1983.tb00599.x>

| Effect                |                  |          |          |
|-----------------------|------------------|----------|----------|
|                       | Degr. of freedom | F        | p        |
| Intercept             | 1                | 12,53640 | 0,000831 |
| Age                   | 1                | 5,44532  | 0,023374 |
| Mother D              | 1                | 0,69864  | 0,406925 |
| Father D              | 1                | 0,07577  | 0,784165 |
| Baseline f11 eye ave  | 1                | 0,19729  | 0,658689 |
| Baseline f12 eye ave  | 1                | 3,57979  | 0,063853 |
| Baseline f22 eye ave  | 1                | 0,13105  | 0,718762 |
| Astigmatism           | 1                | 4,45179  | 0,039514 |
| Error                 | 54               |          |          |
| Component             | 2                | 5,24723  | 0,006686 |
| Comp.*Age             | 2                | 3,49656  | 0,033775 |
| Comp.*Mother D        | 2                | 4,20396  | 0,017451 |
| Comp.*Father D        | 2                | 0,83757  | 0,435554 |
| Comp.*BL. f11 eye ave | 2                | 15,56982 | 0,000001 |
| Comp.*BL. f12 eye ave | 2                | 2,86704  | 0,061206 |
| Comp.*BL. f22 eye ave | 2                | 16,19851 | 0,000001 |
| Comp.*Astigmatism     | 2                | 2,35092  | 0,100140 |
| Error                 | 108              |          |          |

Table S1. Statistical values for Long’s matrix refractive components f11, f12, and f22 analysis. Significant results are indicated in red.

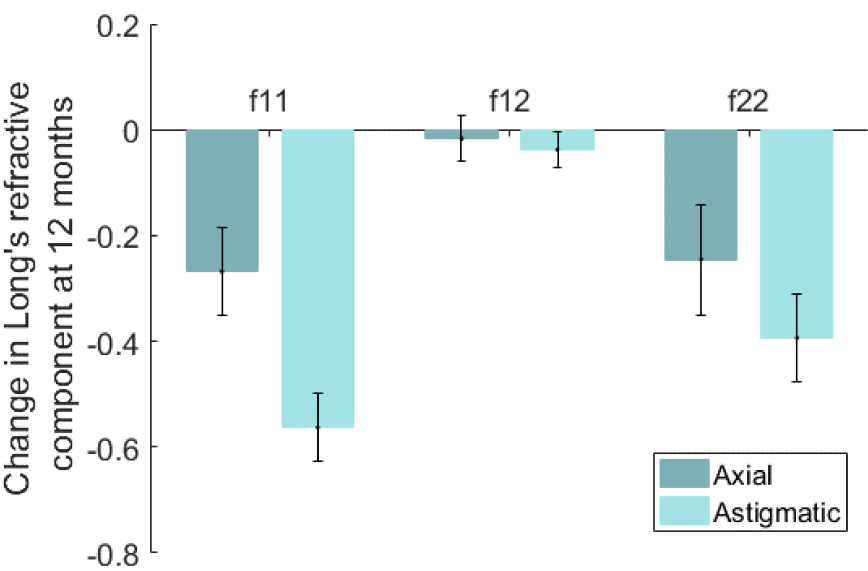

Figure S1. Change in refractive power (Long’s components) over 12 months as a result of DIMS therapy. N=62, errorbars represent SE.
